# Supplementary material for: Histone deacetylase inhibitors differentially regulate c-Myc expression in retinoblastoma cells
Source: PubMed Central journal article supplement — Oncol Lett. 2019 Nov 19;19(1):460–8. doi: 10.3892/ol.2019.11111 (PMC6923973; doi:10.3892/ol.2019.11111), 2019-11-19
Supplement: Supplementary_Data.pdf [file Supplementary_Data.pdf]

Figure S1. HDAC inhibitors differentially regulate HDAC expression in WERI-Rb1 cells. WERI-Rb1 cells were treated with 500 nM TSA, 20  $\mu$ M SAHA, 20 mM VPA or 10  $\mu$ M MS-275 for 6 h. Reverse transcription-quantitative PCR analysis indicated that compared with the control, HDAC mRNA expression was altered to various levels by these HDAC inhibitors. All results were confirmed in three independent experiments. \*P<0.05 vs. respective control. HDAC, histone deacetylase; TSA, trichostatin A; SAHA, vorinostat; VPA, valproic acid sodium salt; MS-275, entinostat.

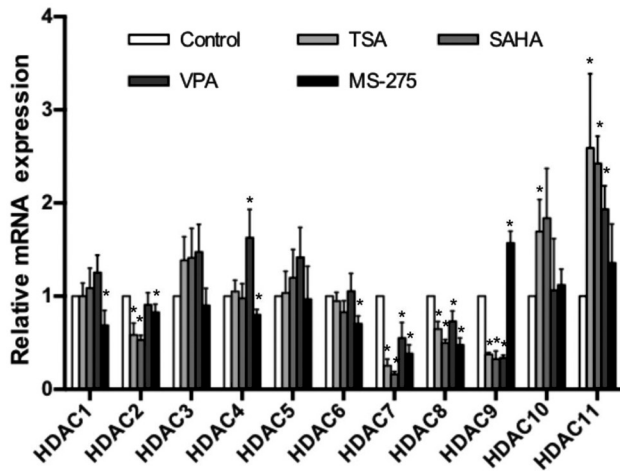

Table SI. Sequences of primers.

| Gene           | Sequence                                                            |
|----------------|---------------------------------------------------------------------|
| $\beta$ -actin | F: 5'-CACCACACCTTCTACAATGAG-3'<br>R: 5'-TAGCACAGCCTGGATAGCAAC-3'    |
| c-Myc          | F: 5'-AGAGTCTGGATCACCTTCTGCT-3'<br>R: 5'-ACACTGTCCAACCTTGACCCTCT-3' |
| HDAC1          | F: 5'-ACTACGACGGGGATGTTGGA-3'<br>R: 5'-TCCTCAGCATTGGCTTTGTG-3'      |
| HDAC2          | F: 5'-AAACTGCATATTAGTCCTTCAA-3'<br>R: 5'-TGAGGTAACATGCGCAAATTTT-3'  |
| HDAC3          | F: 5'-TACGGAGCTGGACACCCTAT-3'<br>R: 5'-TGTAGTCCTCGGAGTGGAAG-3'      |
| HDAC4          | F: 5'-GGTTTGAGAGCAGGCAGAAC-3'<br>R: 5'-CAGAGAATGAGGCCAAGGAG-3'      |
| HDAC5          | F: 5'-GCCAGCACTGAGGTAAAGCTG-3'<br>R: 5'-CTCTGGTCCAAAGAAGCATGG-3'    |
| HDAC6          | F: 5'-CATTAGGCCTCCTGGACATCA-3'<br>R: 5'-CGGTGTTTCTGTTGAGCATAG-3'    |
| HDAC7          | F: 5'-TGTCTGCTGGATTTGATGC-3'<br>R: 5'-TGAGGTTGGGTTTCTGTTT-3'        |
| HDAC8          | F: 5'-CAATGATGCTGTCCTGGGAAT-3'<br>R: 5'-GGAGAATTTGTGCAGGGACAC-3'    |
| HDAC9          | F: 5'-TGGGCCAACTGGAAGTGTTAC-3'<br>R: 5'-GTTGGGCAAAGAAGGAGAGGT-3'    |
| HDAC10         | F: 5'-ACCCAGCGTCCTTTACTTC-3'<br>R: 5'-GTAGTCAGCGTTTCCCATCC-3'       |
| HDAC11         | F: 5'-GGATGTCTACAACCGCCACAT-3'<br>R: 5'-GTGCTCCTGGAGGGATTTCTT-3'    |

F, forward; R, reverse; HDAC, histone deacetylase.

Table SII. Relative HDAC mRNA expression in WERI-Rb1 cells treated with HDAC inhibitors analyzed by reverse transcription-quantitative PCR.

| HDAC   | TSA                      | SAHA                     | VPA                      | MS-275                   |
|--------|--------------------------|--------------------------|--------------------------|--------------------------|
| HDAC1  | 1.003±0.137              | 1.090±0.212              | 1.255±0.188              | 0.689±0.160 <sup>a</sup> |
| HDAC2  | 0.584±0.127 <sup>a</sup> | 0.532±0.051 <sup>a</sup> | 0.909±0.130              | 0.829±0.087 <sup>a</sup> |
| HDAC3  | 1.385±0.252              | 1.411±0.317              | 1.476±0.294              | 0.902±0.183              |
| HDAC4  | 1.051±0.120              | 0.979±0.156              | 1.630±0.302 <sup>a</sup> | 0.801±0.056 <sup>a</sup> |
| HDAC5  | 1.034±0.233              | 1.198±0.304              | 1.418±0.319              | 0.969±0.352              |
| HDAC6  | 0.949±0.091              | 0.829±0.124 <sup>a</sup> | 1.055±0.189              | 0.706±0.083 <sup>a</sup> |
| HDAC7  | 0.254±0.070 <sup>a</sup> | 0.162±0.031 <sup>a</sup> | 0.551±0.168 <sup>a</sup> | 0.383±0.096 <sup>a</sup> |
| HDAC8  | 0.649±0.081 <sup>a</sup> | 0.498±0.037 <sup>a</sup> | 0.732±0.109 <sup>a</sup> | 0.480±0.072 <sup>a</sup> |
| HDAC9  | 0.375±0.021 <sup>a</sup> | 0.326±0.087 <sup>a</sup> | 0.338±0.031 <sup>a</sup> | 1.572±0.125 <sup>a</sup> |
| HDAC10 | 1.695±0.343 <sup>a</sup> | 1.840±0.531              | 1.065±0.553              | 1.122±0.169              |
| HDAC11 | 2.592±0.795 <sup>a</sup> | 2.426±0.293 <sup>a</sup> | 1.933±0.253 <sup>a</sup> | 1.358±0.416              |

Data represent the means ± standard deviation, n=3. <sup>a</sup>P<0.05 vs. control (relative HDAC mRNA expression: Control, 1). HDAC, histone deacetylase; TSA, trichostatin A; SAHA, vorinostat; VPA, valproic acid sodium salt; MS-275, entinostat.
